# Supplementary material for: NMR analysis of 15N-labeled naphthyridine carbamate dimer (NCD) to contiguous CGG/CGG units in DNA
Source: Royal Society of Chemistry journal article supplement (doi:10.1039/d4cc00544a), 2024-01-01
Supplement: d4cc00544a1.pdf [file d4cc00544a1.pdf]

## Supporting Information for

### **NMR analysis of $^{15}\text{N}$ -labeled naphthyridine carbamate dimer (NCD) to contiguous CGG/CGG units in DNA**

Takeshi Yamada,<sup>a, b</sup> Shuhei Sakurabayashi,<sup>a</sup> Noriaki Sugiura,<sup>a</sup> Hitoshi Haneoka,<sup>b</sup> and Kazuhiko Nakatani<sup>a\*</sup>

<sup>a</sup> *Department of Regulatory Bioorganic Chemistry, SANKEN, Osaka University, Mihogaoka 8-1, Ibaraki, Osaka 567-0047, JAPAN.*

<sup>b</sup> *Current address: Nucleotide and Peptide Drug Discovery Center, Tokyo Medical and Dental University, Yushima 1-5-45, Bunkyo-ku, Tokyo 113-8519, Japan.*

<sup>c</sup> *Comprehensive Analysis Center, SANKEN, Osaka University, Mihogaoka 8-1, Ibaraki, Osaka 567-0047, Japan.*

|                           |   |
|---------------------------|---|
| Supporting Figures .....  | 3 |
| Experimental section..... | 5 |

## Supporting Figures

**Table S1.** The synthetic studies of the amination reaction on 2-chloro-7-methyl-1,8-naphthyridine. Entry 4 is used for the preparation of 2- $[^{15}\text{N}]$ amino-7-methyl-1,8-naphthyridine.

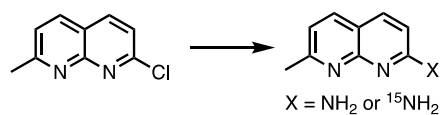

| Entry | Amine source                    | X                  | Eq of X | additive  | Time (h) | Yield (%) |
|-------|---------------------------------|--------------------|---------|-----------|----------|-----------|
| 1     | 22% $\text{NH}_3\text{aq}$      | $\text{NH}_2$      | 100     | -         | 12       | ND        |
| 2     | 22% $\text{NH}_3\text{aq}$      | $\text{NH}_2$      | 100     | -         | 24       | 8         |
| 3     | 22% $\text{NH}_3\text{aq}$      | $\text{NH}_2$      | 100     | Cu (1 eq) | 24       | 55        |
| 4     | 22% $^{15}\text{NH}_3\text{aq}$ | $^{15}\text{NH}_2$ | 15      | Cu (1 eq) | 24       | 40        |

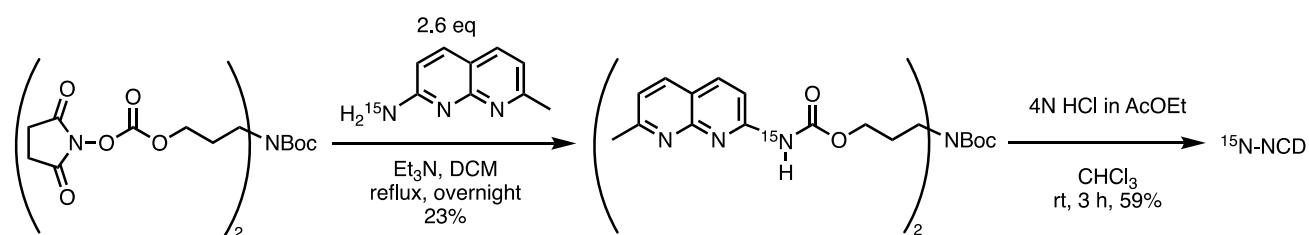

**Scheme. S1** Synthesis of  $^{15}\text{N}$ -NCD

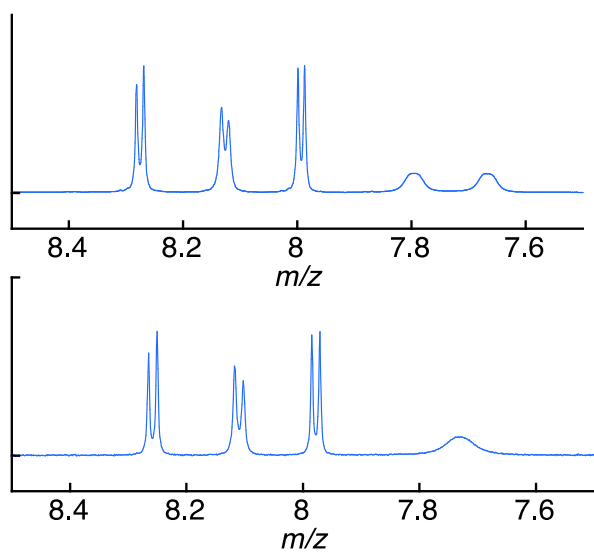

**Fig. S1** The enlarged view of  $^1\text{H}$ -NMR spectrum of (A) Boc-protected  $^{15}\text{N}$ -NCD, and (B) Boc-protected NCD

## Experimental section

**General.** Reagents and solvents were purchased from standard suppliers and used without further purification. Reactions were monitored with TLC plate silica gel 60 F<sub>254</sub>. Spots on TLC were monitored with UV, phosphomolybdic acid, ninhydrin, or anisaldehyde. A C-200 Silica gel was used for silica gel flash chromatography. NMR spectra were measured with 600 MHz (JEOL) or 700 MHz (Bruker). NMR spectra were analyzed by Delta for Mac (JEOL, version 6.0) or Topspin for Mac (Bruker, version 4.1.4). The multiplicity was expressed as follows; s = singlet, d = doublet, t = triplet, m = multiplet, br = broad. The chemical shifts are expressed in ppm relative to residual solvent as an internal standard, and coupling constants (*J* values) were represented in hertz.

**Preparation of 2-amino( $^{15}\text{N}$ )-1,8-naphthyridine.** To prepare  $^{15}\text{N}$ -NCD, the synthesis method for 2-amino( $^{15}\text{N}$ )-1,8-naphthyridine (**1**) was investigated. (Table S1) 2-Chloro-1,8-naphthyridine was selected as the precursor to compound **1**. Preliminary synthetic investigations were performed using unlabeled aqueous ammonia. When 2-chloro-1,8-naphthyridine was treated with aqueous ammonia at 100 °C in a sealed tube for 12 h, 2-amino-1,8-naphthyridine was not detected. Even reaction time was extended to 24 h, the yield of 2-amino-1,8-naphthyridine was only an 8% yield. (Entry 2) Next, referring to the synthesis study demonstrating the copper (0) catalyzing nucleophilic substitution reaction of 2,6-dichloro-isonicotinic acid using ammonia,<sup>1</sup> 1.0 equivalent copper powder was incorporated into the reaction conditions. The yield was drastically improved to 55%. (Entry 3)

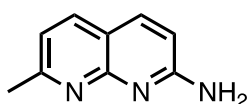

Chemical Formula: C<sub>9</sub>H<sub>9</sub>N<sub>3</sub>  
Exact Mass: 159.07965  
Molecular Weight: 159.19200

**2-amino-7-methyl-1,8-naphthyridine.** 2-Chloro-7-methyl-1,8-naphthyridine (100 mg, 0.560 mmol) and copper powder (35 mg, 0.550 mmol) were added to 6 M NH<sub>3</sub>aq (22wt%, 60 mmol, 10 mL) in a sealed tube. Then the mixture was stirred for 24 h at 100 °C. The reaction mixture was filtered with celite. The celite was washed with 1 M NaOHaq. Then, all filtrate was recovered, and extracted with

CHCl<sub>3</sub>. The organic layer was collected, dried with anhydrous MgSO<sub>4</sub>, filtered, and evaporated under reduced pressure. The crude product was purified by column chromatography on silica gel eluted with CHCl<sub>3</sub>/MeOH = 20/1 to give 2-amino-7-methyl-1,8-naphthyridine (49 mg, 0.307 mmol, 55%) as a white solid. <sup>1</sup>H-NMR (600 MHz, CDCl<sub>3</sub>) δ 7.83 (d, J = 3.0 Hz, 1H), 7.82 (d, J = 3.0 Hz, 1H), 7.08 (d, J = 8.5 Hz, 1H), 6.72 (d, J = 8.5 Hz, 1H), 5.10-4.90 (br, 2H), 2.69 (s, 3H).

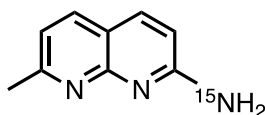

Chemical Formula: C<sub>9</sub>H<sub>9</sub>N<sub>2</sub><sup>15</sup>N  
 Exact Mass: 160.07668  
 Molecular Weight: 160.18511

**2-[<sup>15</sup>N]amino-7-methyl-1, 8-naphthyridine.** 2-Chloro-7-methyl-1,8-naphthyridine (101 mg, 0.565 mmol) and copper powder (38 mg, 0.598 mmol) were added to 6 M <sup>15</sup>NH<sub>3</sub>aq (22wt%, 9.0 mmol, 1.5 mL) in a sealed tube. Then, the mixture was stirred for 24 h at 100 °C. After cooling the mixture to room temperature, the reaction mixture was filtered with celite. The celite was washed with 1 M NaOHaq. All filtrate was recovered, and extracted with CHCl<sub>3</sub>. The obtained organic layer was dried with anhydrous MgSO<sub>4</sub>, filtered, and evaporated under reduced pressure. The crude product was purified by column chromatography on silica gel, eluted with CHCl<sub>3</sub>/MeOH = 20/1 to give 2-[<sup>15</sup>N]amino-7-methyl-1, 8-naphthyridine (37 mg, 0.230 mmol, 40%) as white solid; <sup>1</sup>H-NMR (700 MHz, CDCl<sub>3</sub>) δ 7.83 (d, J = 3.8 Hz, 1H), 7.82 (d, J = 3.8 Hz, 1H), 7.11 (d, J = 8.0 Hz, 1H), 6.74 (d, J = 8.0 Hz, 1H), 5.01 (d, J = 86.9 Hz, 2H), 2.69 (s, 3H); <sup>13</sup>C-NMR (175 MHz, CDCl<sub>3</sub>) δ 162.2, 159.3, 159.2, 156.2, 138.0, 136.1, 118.9, 115.3, 111.3, 111.2, 25.4; <sup>15</sup>N-NMR (175 MHz, CDCl<sub>3</sub>) δ 84.0; HR-ESI-MS *m/z* calcd for C<sub>9</sub>H<sub>10</sub>N<sub>2</sub><sup>15</sup>N [M+H]<sup>+</sup> 161.0840, found 161.0837.

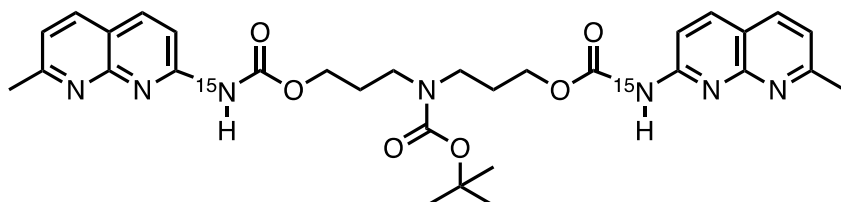

Chemical Formula: C<sub>31</sub>H<sub>37</sub>N<sub>5</sub><sup>15</sup>N<sub>2</sub>O<sub>6</sub>  
 Exact Mass: 605.27460  
 Molecular Weight: 605.66622

**<sup>15</sup>N-NCD-Boc.** To the solution of tert-butyl bis(3-(succinimidylloxycarbonyloxy)-propyl)carbamate (96 mg, 0.18 mmol) in CH<sub>2</sub>Cl<sub>2</sub> (10 mL) was added 2-[<sup>15</sup>N]amino-7-methyl-1,8-naphthyridine (76 mg, 0.47 mmol) and triethylamine (1.6 mL, 11.5 mmol) at room temperature. The solution was stirred for 30 min at room temperature and then refluxed overnight. Then the solution was cooled to room temperature, diluted with CHCl<sub>3</sub>, and washed with saturated NaHCO<sub>3</sub>aq. The organic layer was collected, dried with anhydrous MgSO<sub>4</sub>, filtered, and evaporated under reduced pressure. The crude product was purified by column chromatography on silica gel, eluted with AcOEt/MeOH = 100/0, 100/2, 100/4, 100/6, and then CHCl<sub>3</sub>/MeOH = 100/2 to give <sup>15</sup>N-NCD-Boc (26 mg, 0.0430 mmol, 23%) as a white solid; <sup>1</sup>H-NMR (700 MHz, CDCl<sub>3</sub>) δ 8.28 (d, J = 9.1 Hz, 2H), 8.13 (d, J = 9.1 Hz, 2H), 7.99 (d, J = 8.4 Hz, 2H), 7.73 (d, J = 8.6 Hz, 2H), 7.27 (d, J = 8.4 Hz, 2H), 4.27 (t, J = 6.2 Hz, 4H), 3.45-3.30 (br, 4H), 2.75 (s, 6H), 2.00-1.90 (br, 4H), 1.47 (s, 9H); <sup>15</sup>N-NMR (175 MHz, CDCl<sub>3</sub>) δ 127.2; <sup>13</sup>C-NMR (175 MHz, CDCl<sub>3</sub>) δ 163.2, 155.4, 154.7, 154.6, 153.3, 153.1, 153.0, 139.0, 136.4, 121.3, 118.0, 112.6, 79.9, 63.7, 63.5, 44.4, 44.2, 28.4, 28.2, 27.7, 25.6; HR-ESI-MS *m/z* calcd for C<sub>31</sub>H<sub>37</sub>N<sub>5</sub><sup>15</sup>N<sub>2</sub>O<sub>6</sub>[M+H]<sup>+</sup> 606.2819, found 606.2818.

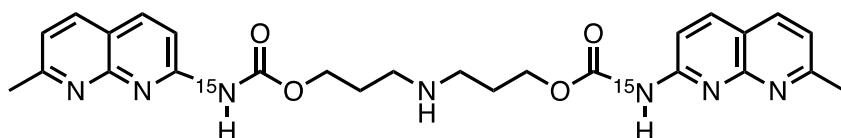

Chemical Formula: C<sub>26</sub>H<sub>29</sub>N<sub>5</sub><sup>15</sup>N<sub>2</sub>O<sub>4</sub>

Exact Mass: 505.22217

Molecular Weight: 505.54922

**<sup>15</sup>N-NCD.** To the solution of <sup>15</sup>N-NCD-Boc (24.8 mg, 0.0411 mmol) in CHCl<sub>3</sub> (2 mL) was added 4 M HCl/AcOEt (10 mL) at 0 °C. The solution was stirred for 1 hour at room temperature. Then the reaction mixture of <sup>15</sup>N-NCD was further purified using RP-HPLC using 0.1% AcOH in H<sub>2</sub>O and acetonitrile. To the solution of <sup>15</sup>N-NCD in H<sub>2</sub>O (3 mL) was added 1 M HCl<sub>aq</sub> dropwise. This process was three times for salt exchange, and freeze-dried to give <sup>15</sup>N-NCD +HCl (13.1 mg, 59%) <sup>1</sup>H-NMR (600 MHz, D<sub>2</sub>O) δ 8.54 (d, J = 8.2 Hz, 2H), 8.25 (d, J = 8.9 Hz, 2H), 8.01 (d, J = 8.9 Hz, 2H), 7.53 (d, J = 8.2 Hz, 2H), 4.25 (t, J = 5.5 Hz, 4H), 3.15 (t, J = 7.2 Hz, 4H), 2.74 (s, 6H), 2.07-2.03 (m, 4H); <sup>15</sup>N-NMR (175 MHz, D<sub>2</sub>O) δ 123.1; <sup>13</sup>C-NMR (175 MHz, D<sub>2</sub>O) δ 159.5, 156.7, 156.6, 154.0, 153.8, 147.1, 147.1, 145.6, 140.0, 122.1, 119.1, 116.0, 116.0, 63.6, 45.3, 24.9, 20.2; HR-ESI-MS *m/z*: calcd for C<sub>31</sub>H<sub>37</sub>N<sub>5</sub><sup>15</sup>N<sub>2</sub>O<sub>6</sub>[M+H]<sup>+</sup> 506.2295, found 506.2331.

$^1\text{H}$ -NMR of 2- $^{15}\text{N}$ ]amino-7-methyl-1, 8-naphthyridine in  $\text{CDCl}_3$

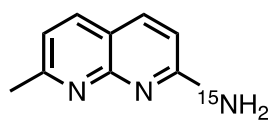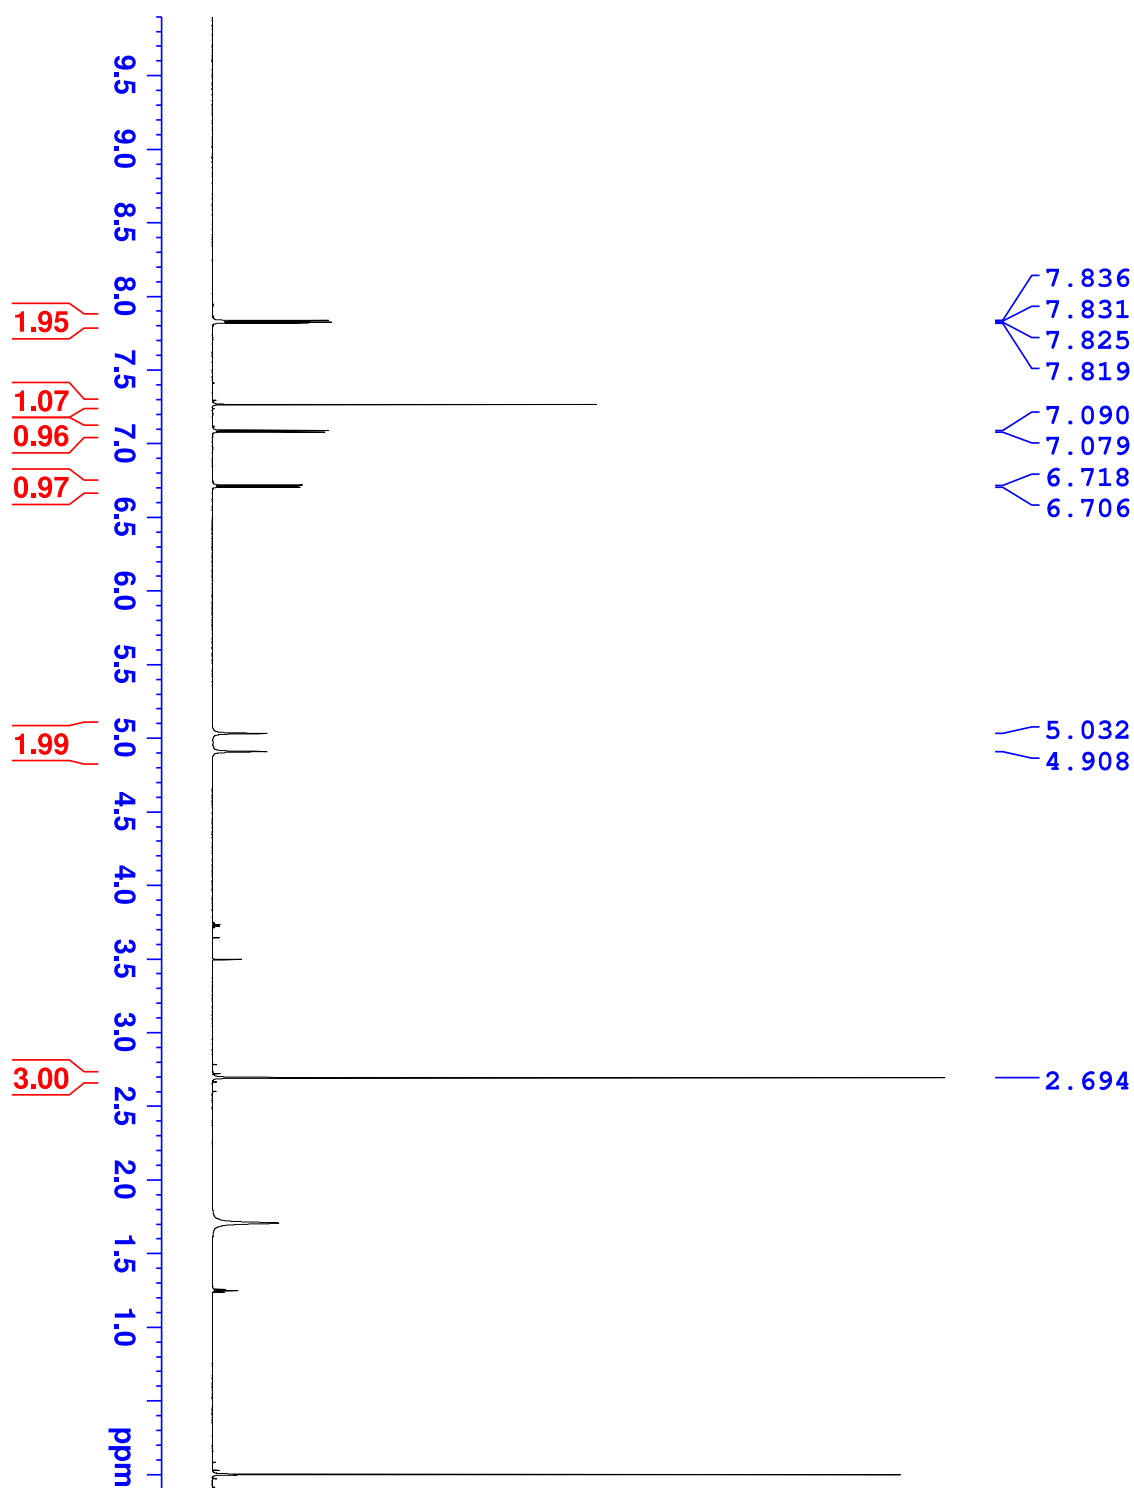

$^{13}\text{C}$ -NMR of 2- $^{15}\text{N}$ amino-7-methyl-1,8-naphthyridine in  $\text{CDCl}_3$

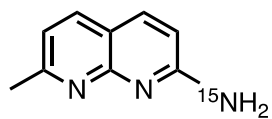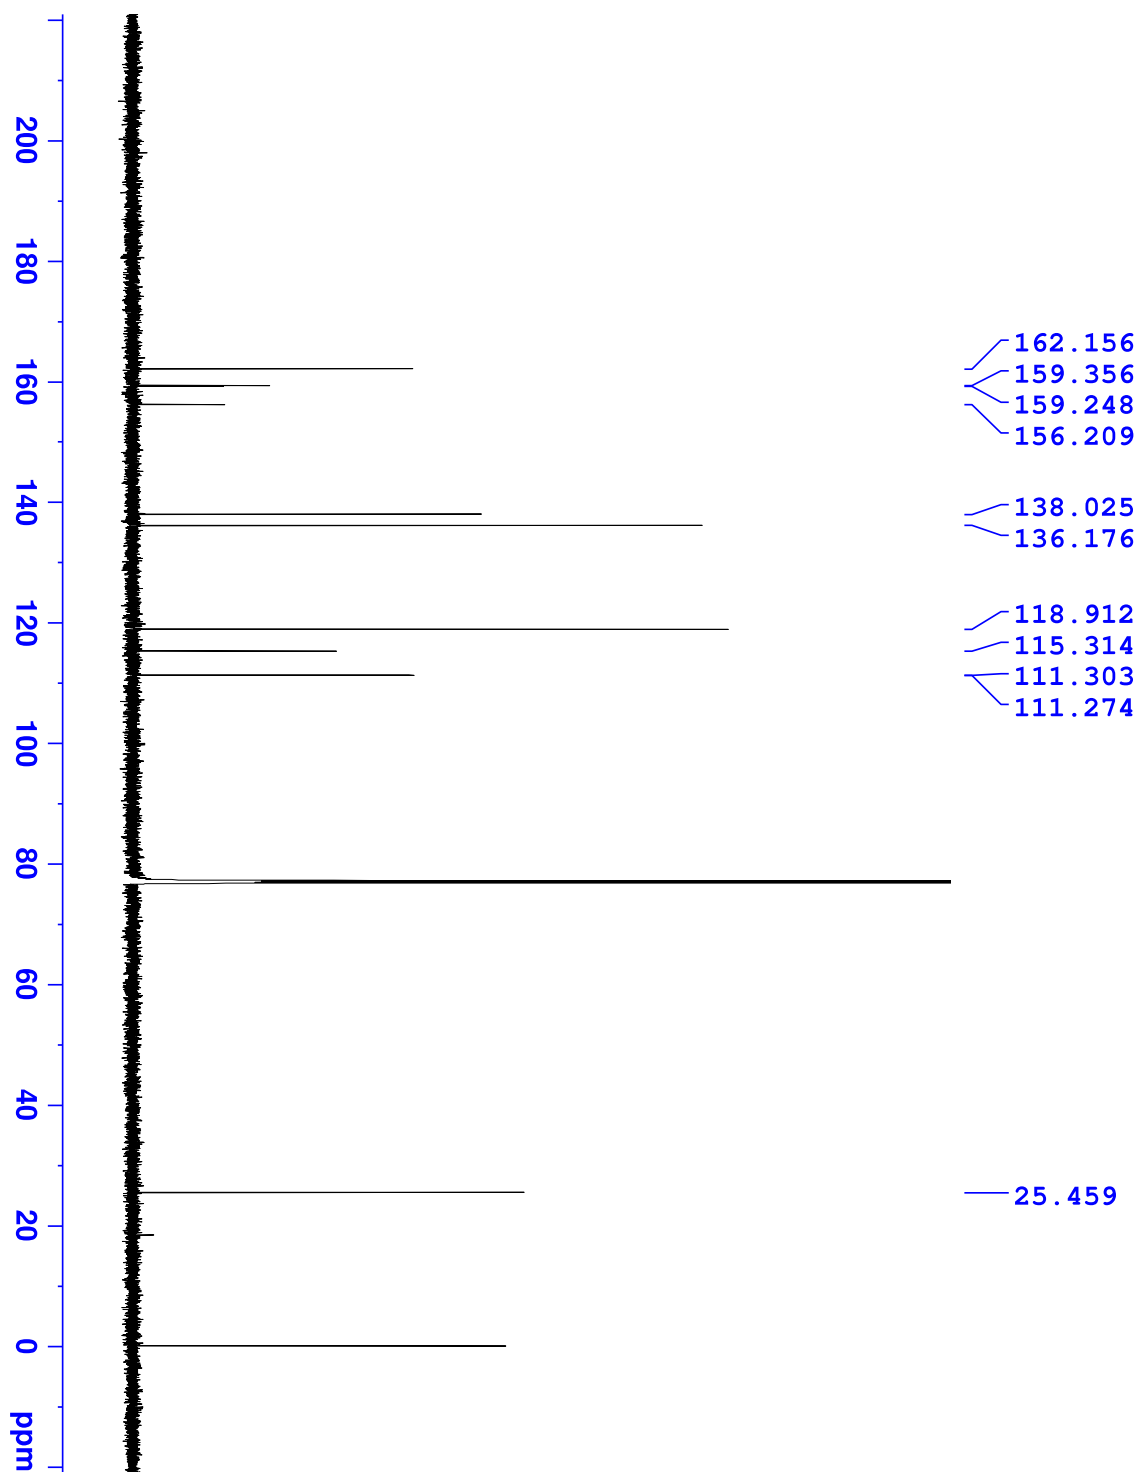

COSY of 2-[ $^{15}\text{N}$ ]amino-7-methyl-1, 8-naphthyridine in  $\text{CDCl}_3$

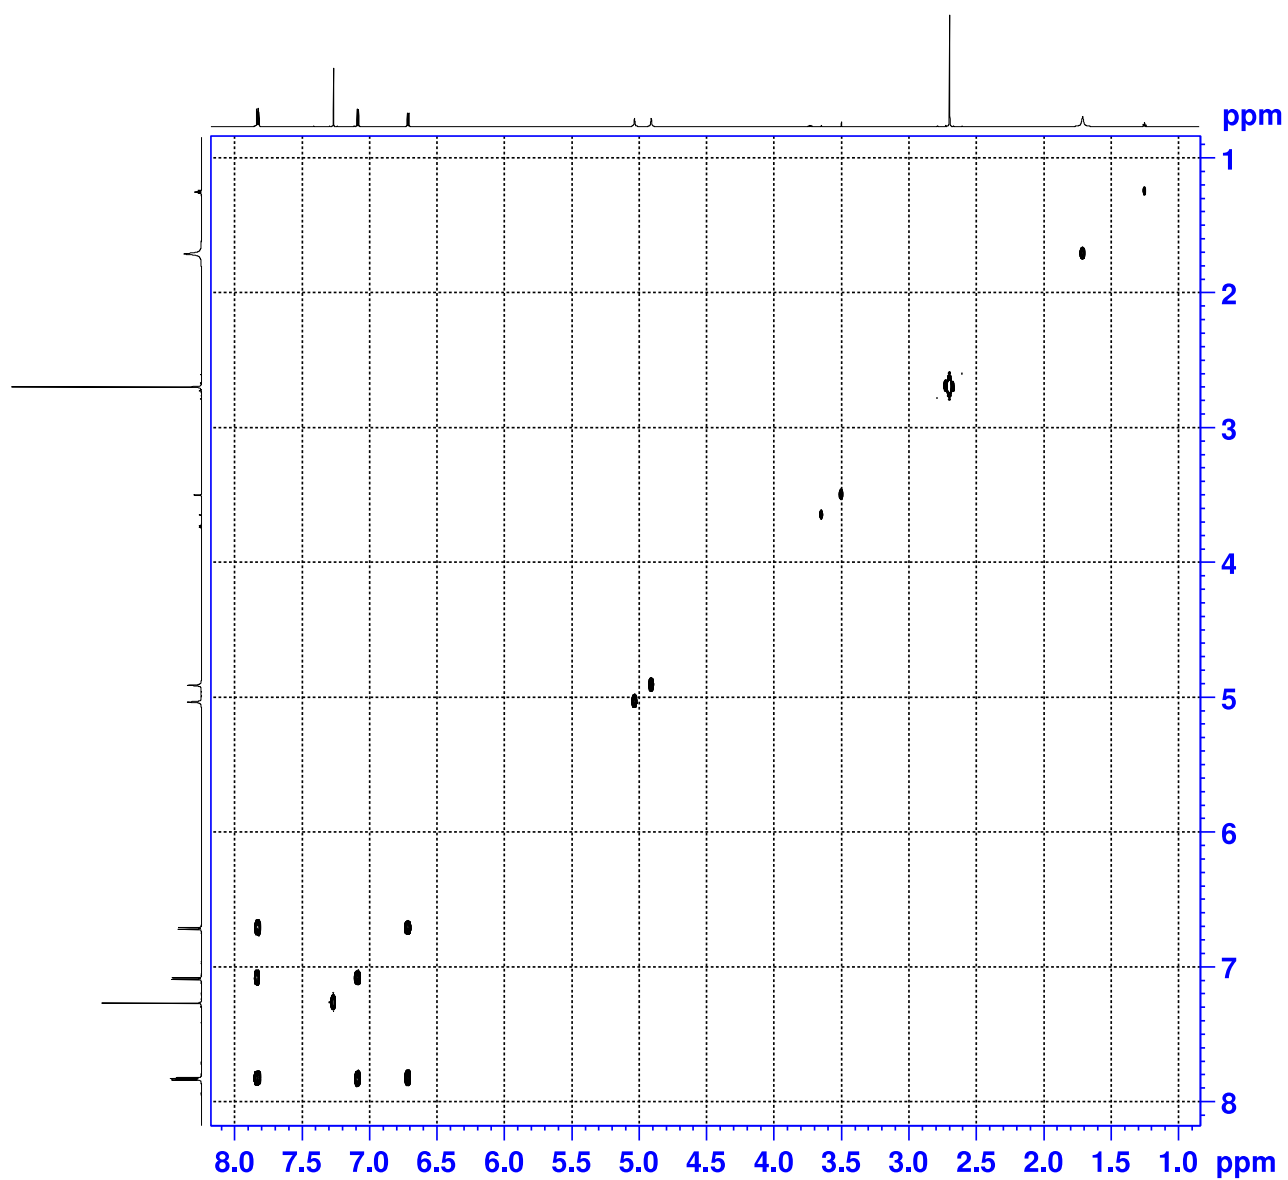

$^{15}\text{N}$ -NMR of 2- $^{15}\text{N}$ amino-7-methyl-1,8-naphthyridine in  $\text{CDCl}_3$

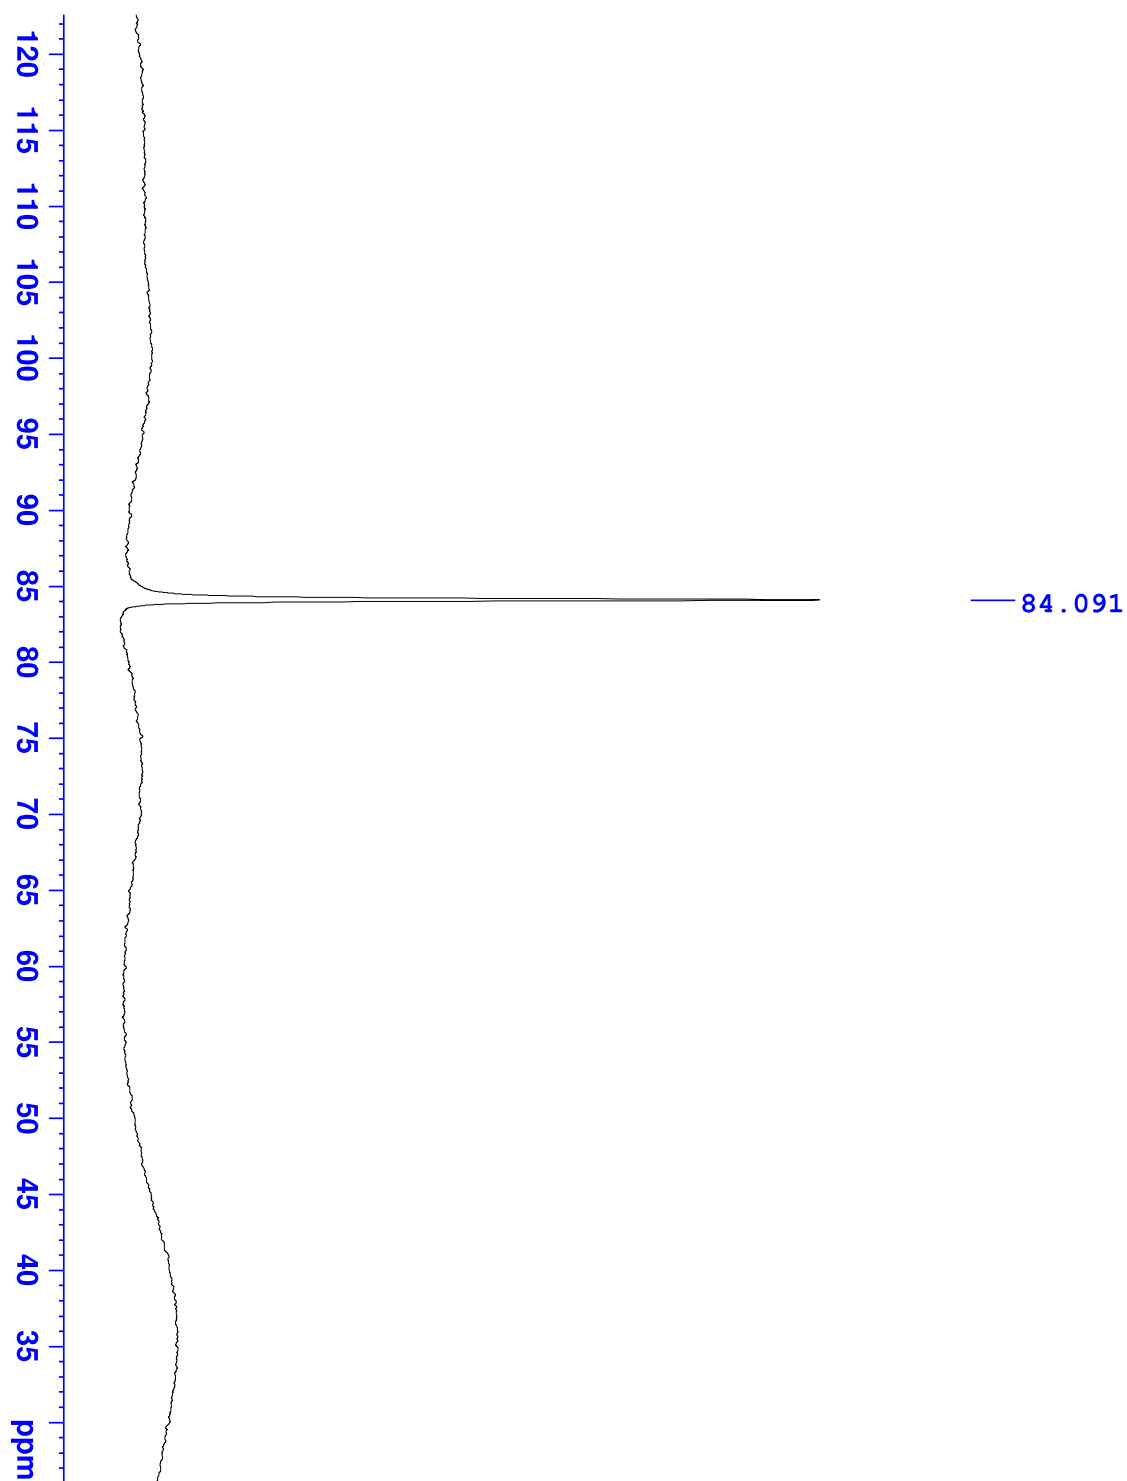

$^1\text{H}$ - $^{15}\text{N}$  HSQC of 2- $^{15}\text{N}$ amino-7-methyl-1, 8-naphthyridine in  $\text{CDCl}_3$



$^1\text{H}$ - $^{15}\text{N}$  HSQC

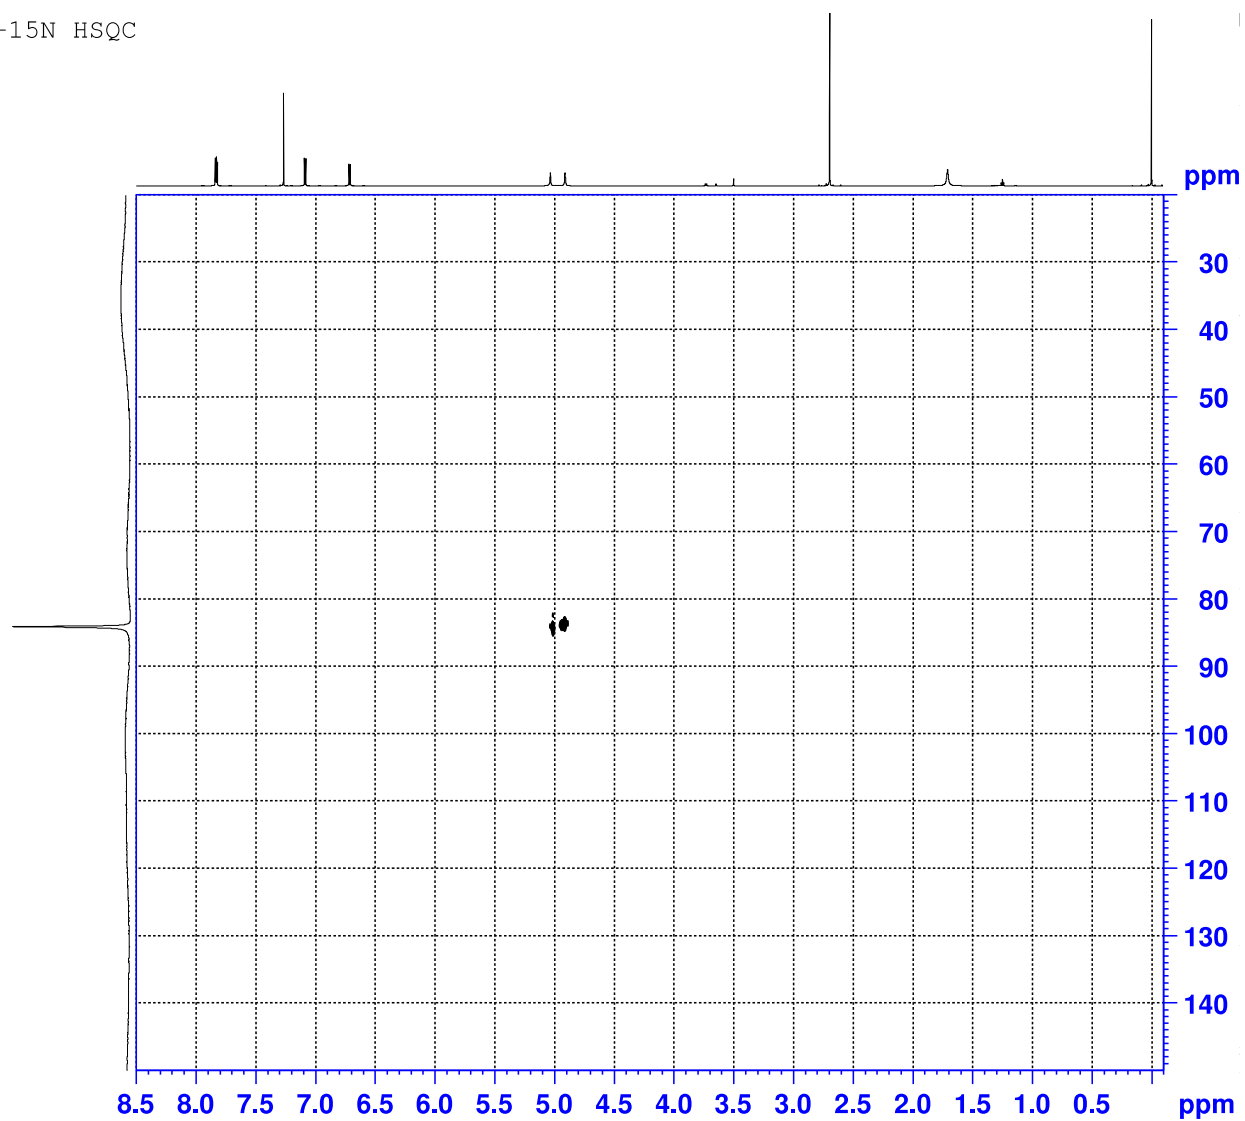

$^1\text{H}$ -NMR spectrum of  $^{15}\text{N}$ -NCD-Boc in  $\text{CDCl}_3$

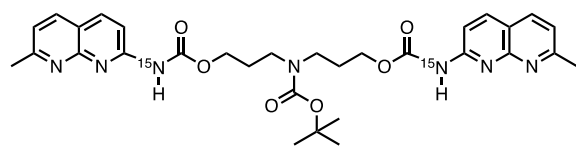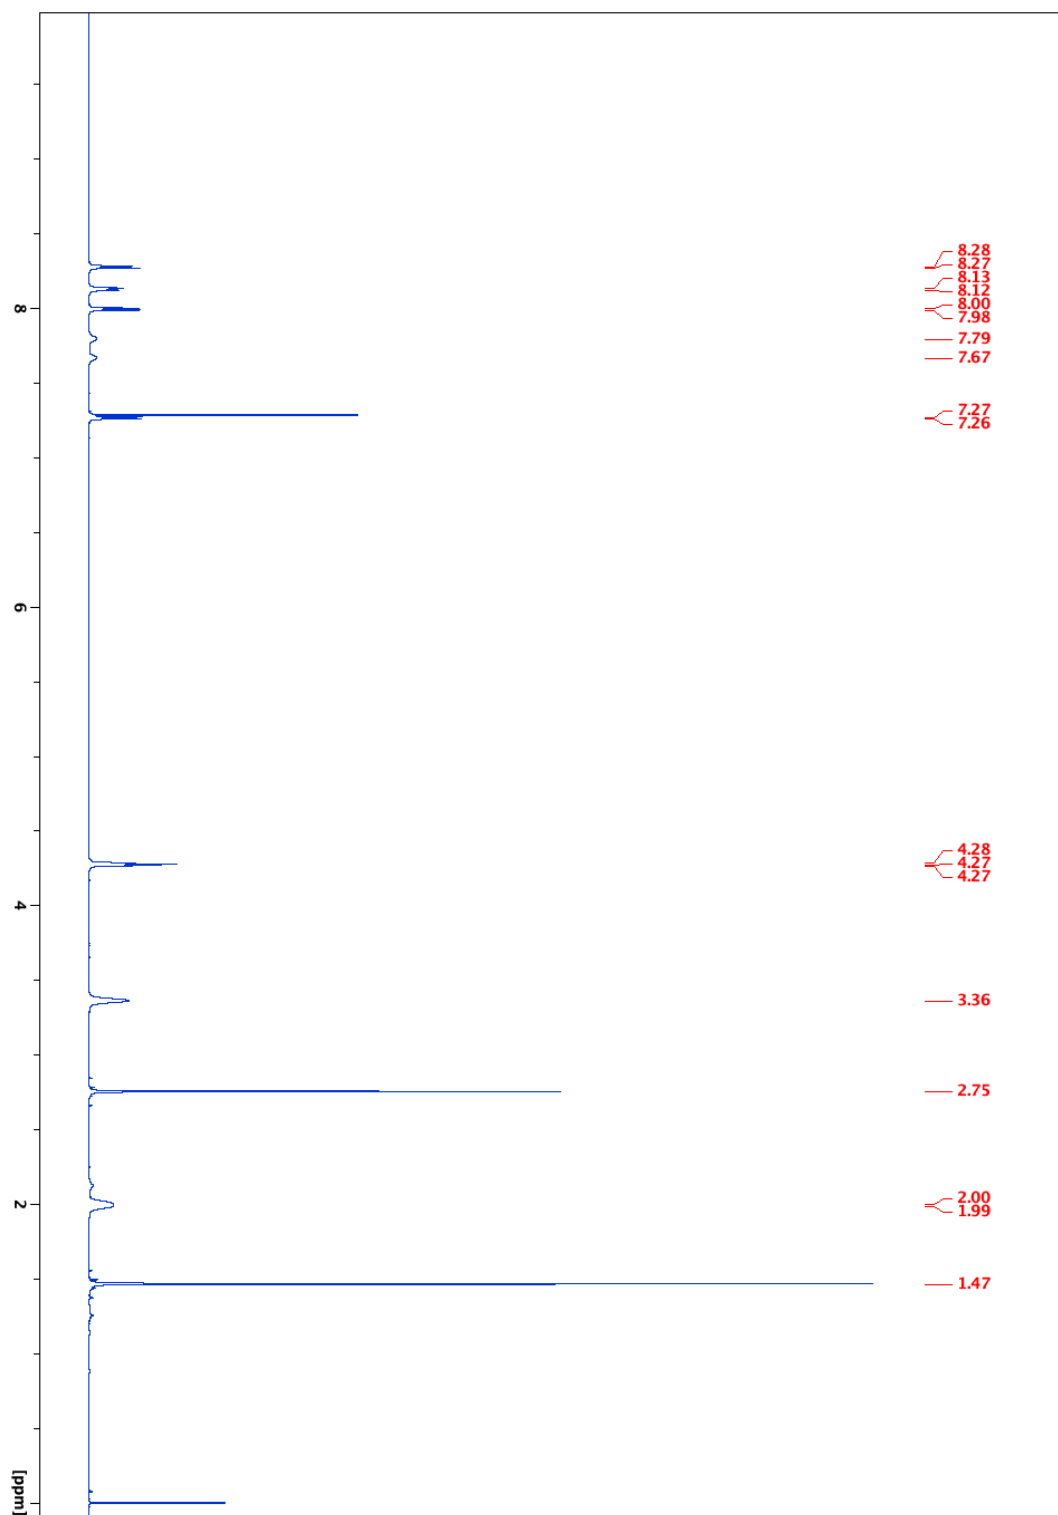

$^{13}\text{C}$ -NMR spectrum of  $^{15}\text{N}$ -NCD-Boc in  $\text{CDCl}_3$

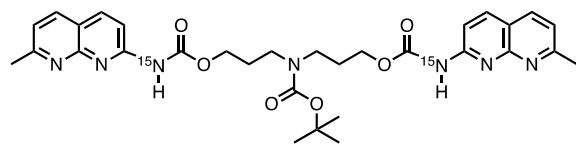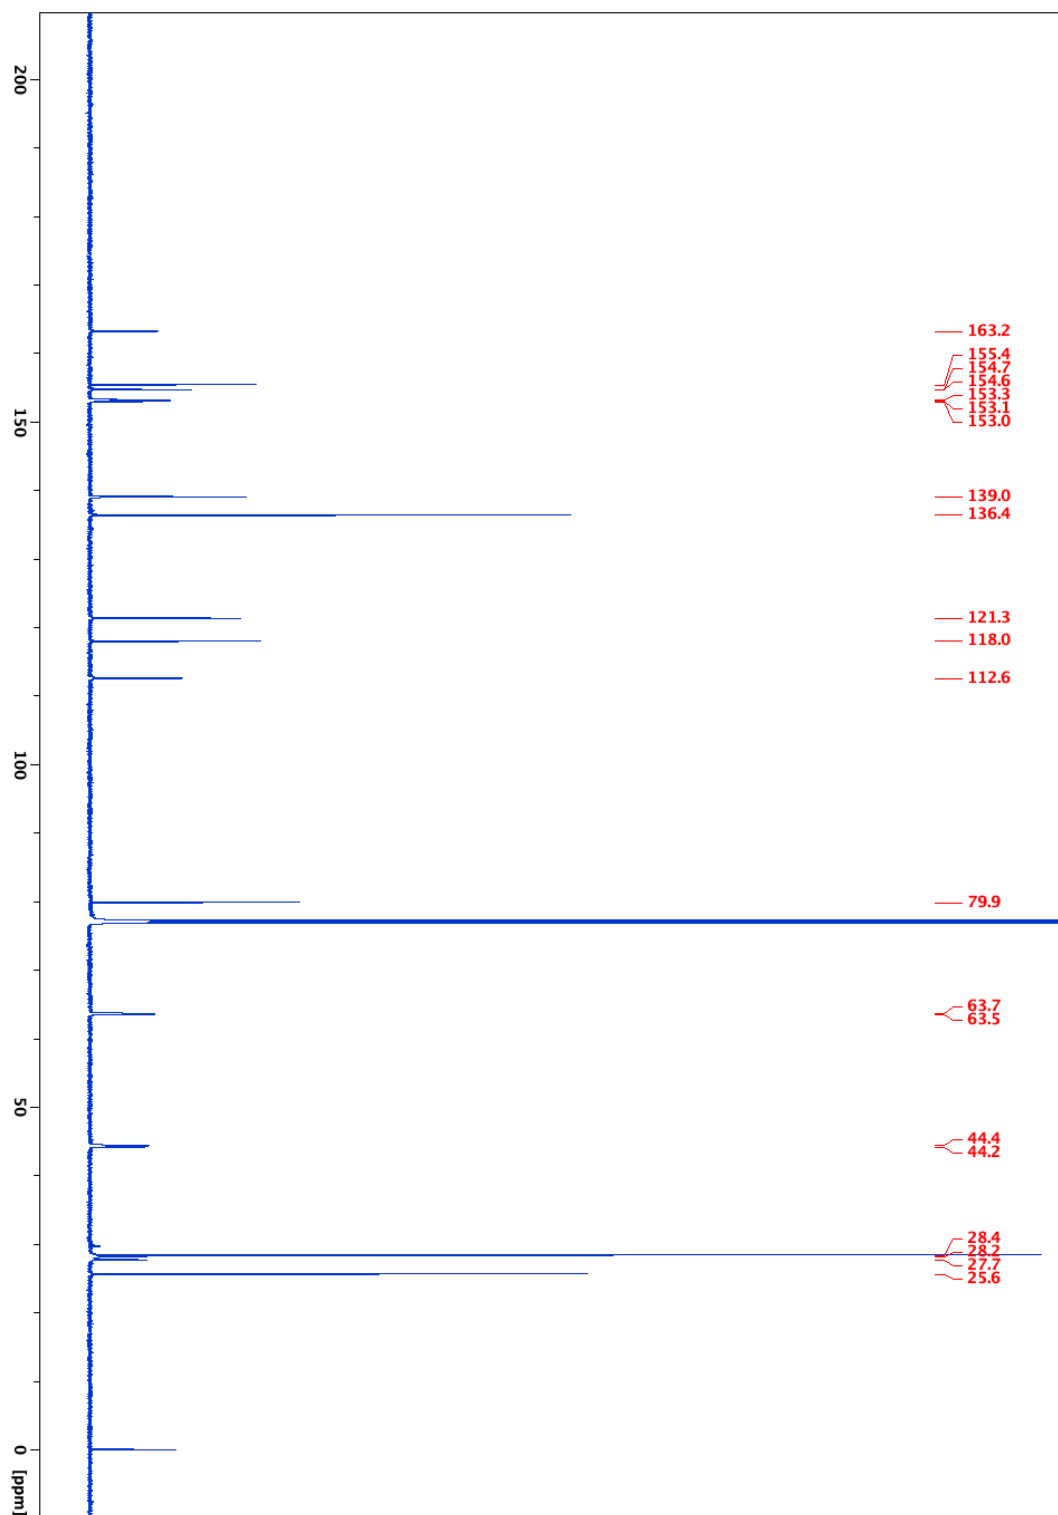

COSY spectrum of  $^{15}\text{N}$ -NCD-Boc in  $\text{CDCl}_3$

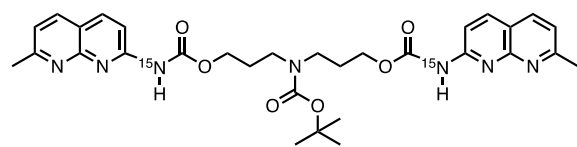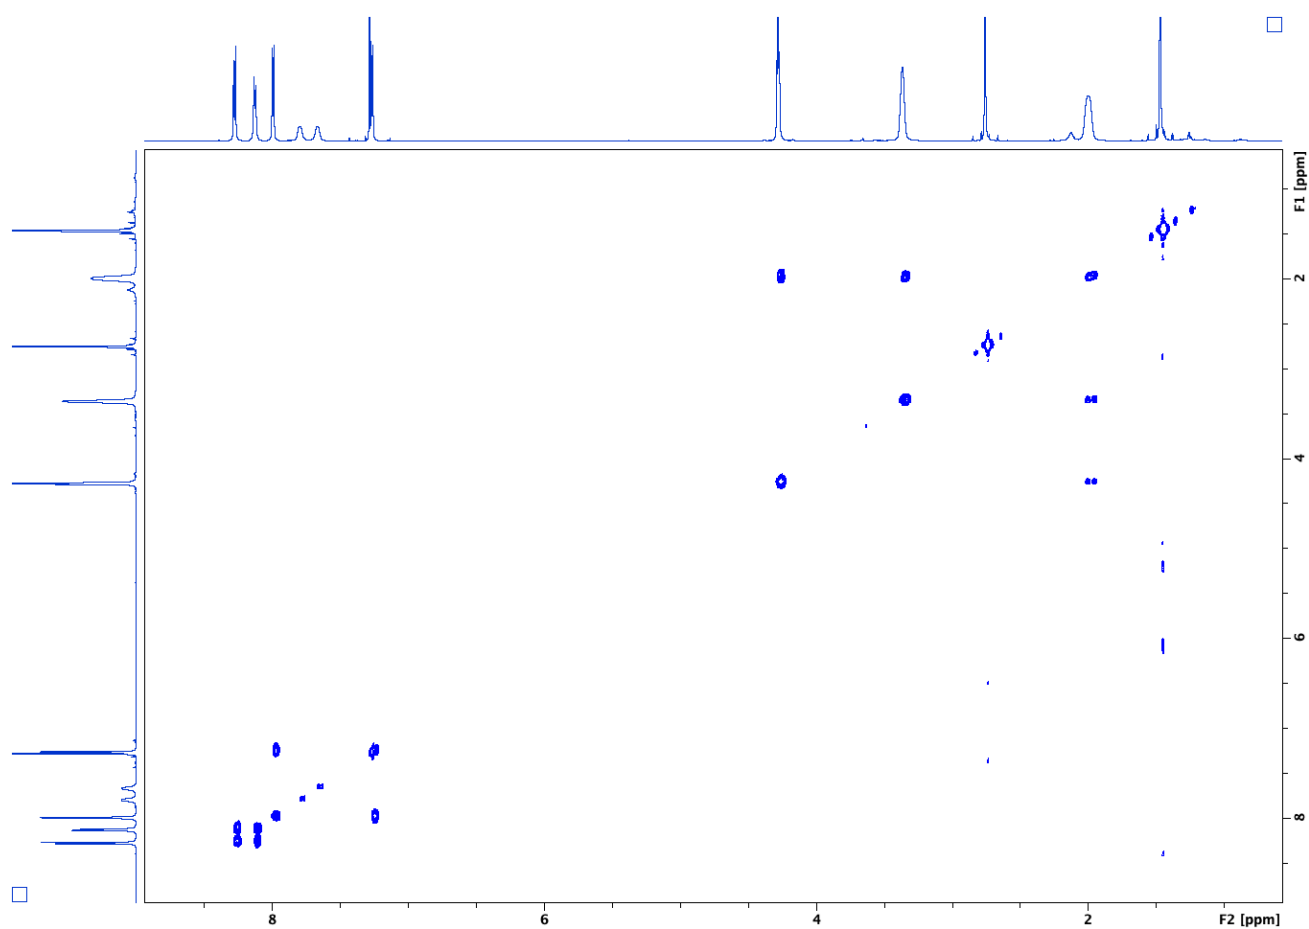

$^{15}\text{N}$ -NMR spectrum of  $^{15}\text{N}$ -NCD-Boc in  $\text{CDCl}_3$

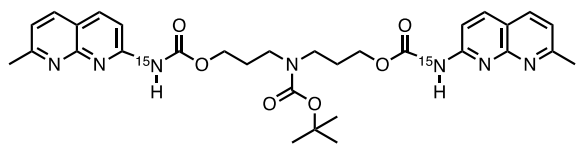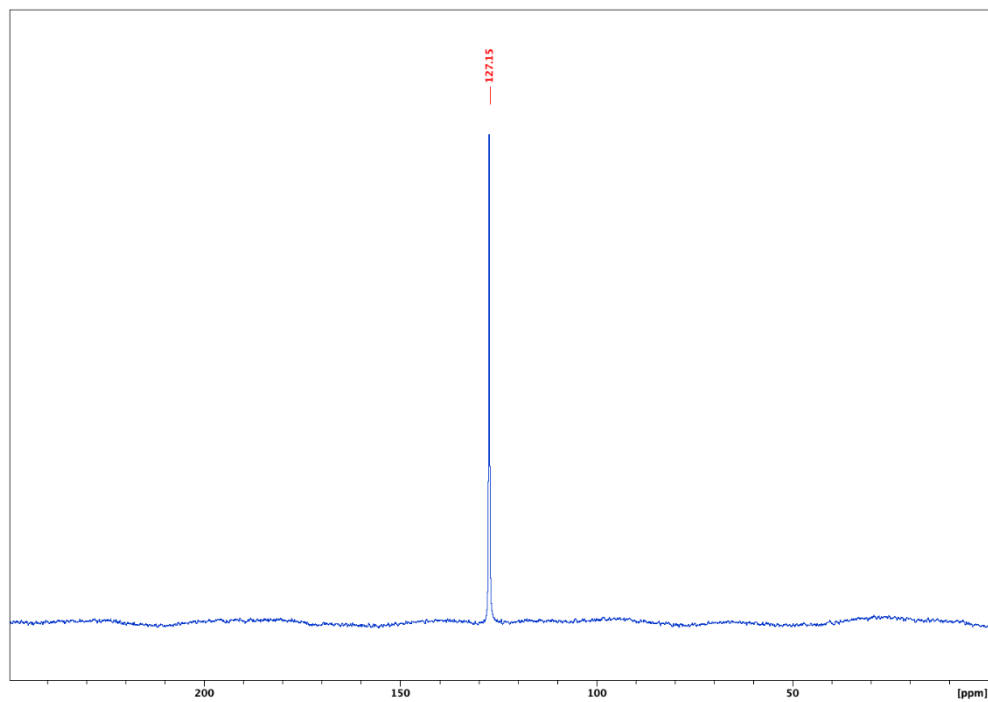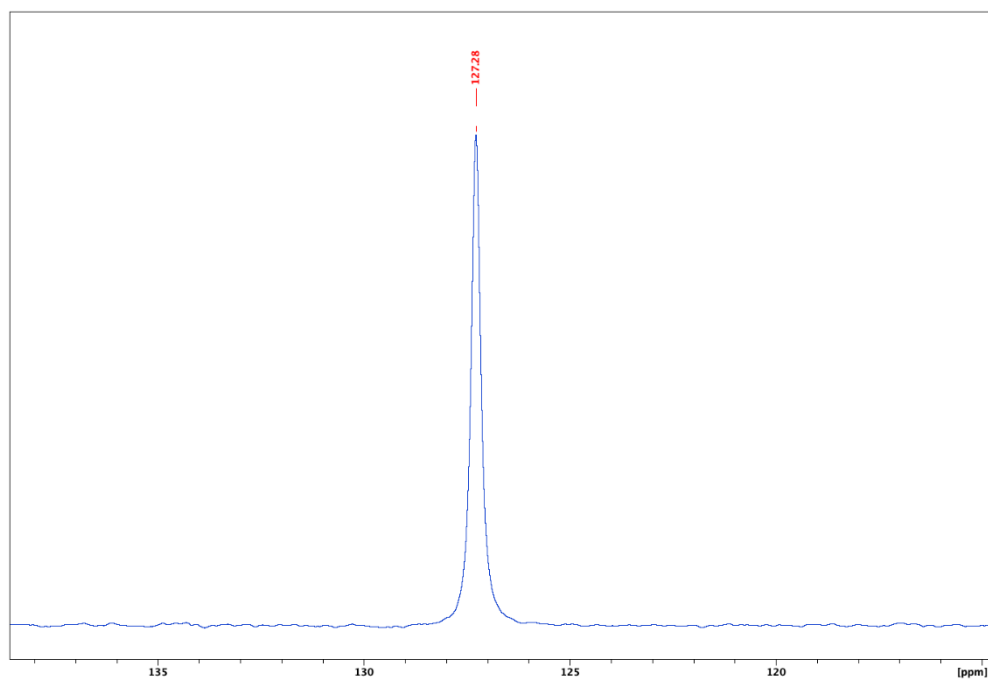

$^1\text{H}$ - $^{15}\text{N}$ -HSQC spectrum of  $^{15}\text{N}$ -NCD-Boc in  $\text{CDCl}_3$

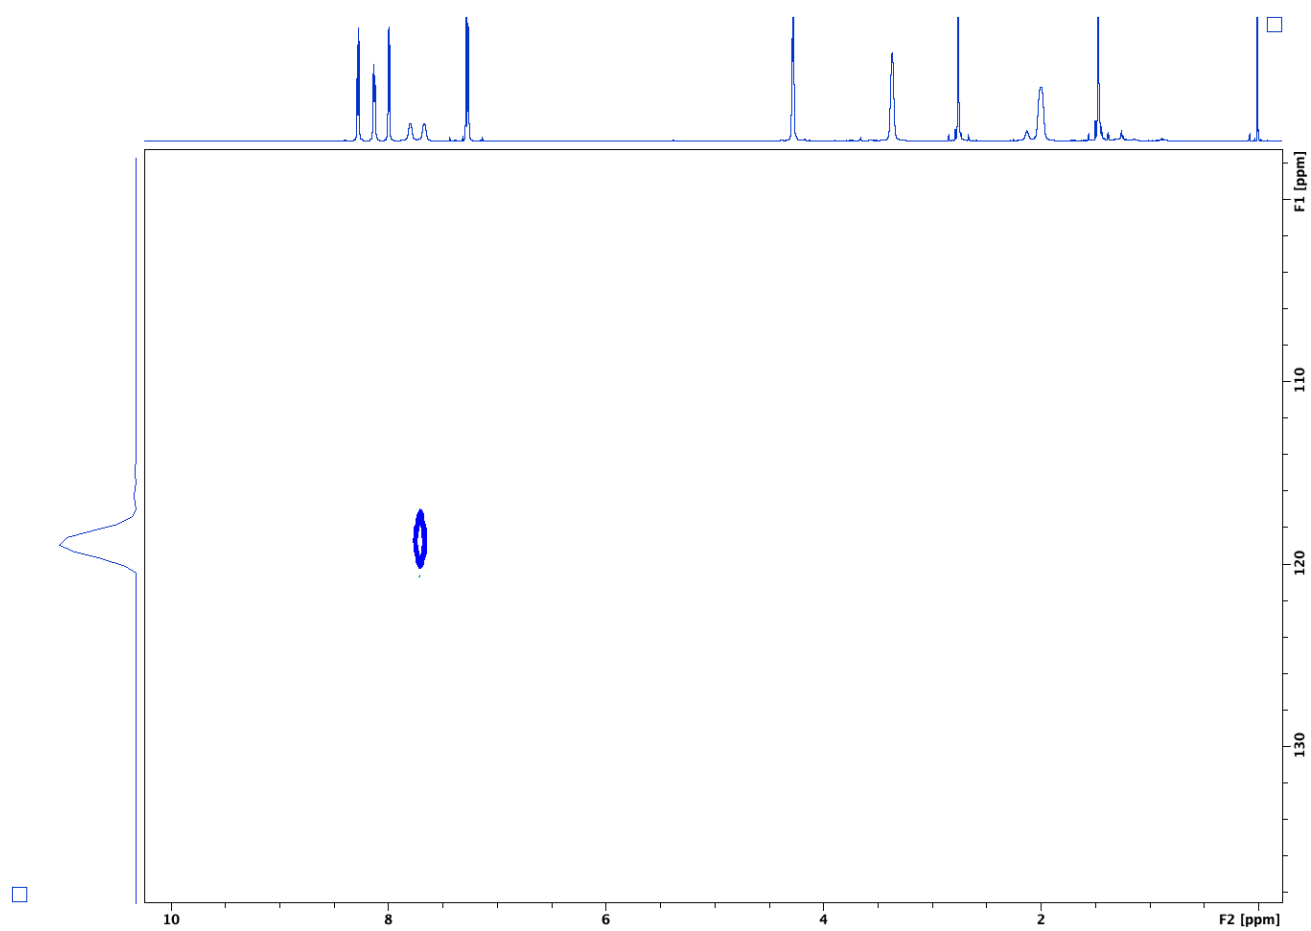

$^1\text{H}$ -NMR spectrum of  $^{15}\text{N}$ -NCD in  $\text{D}_2\text{O}$

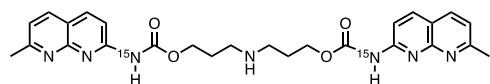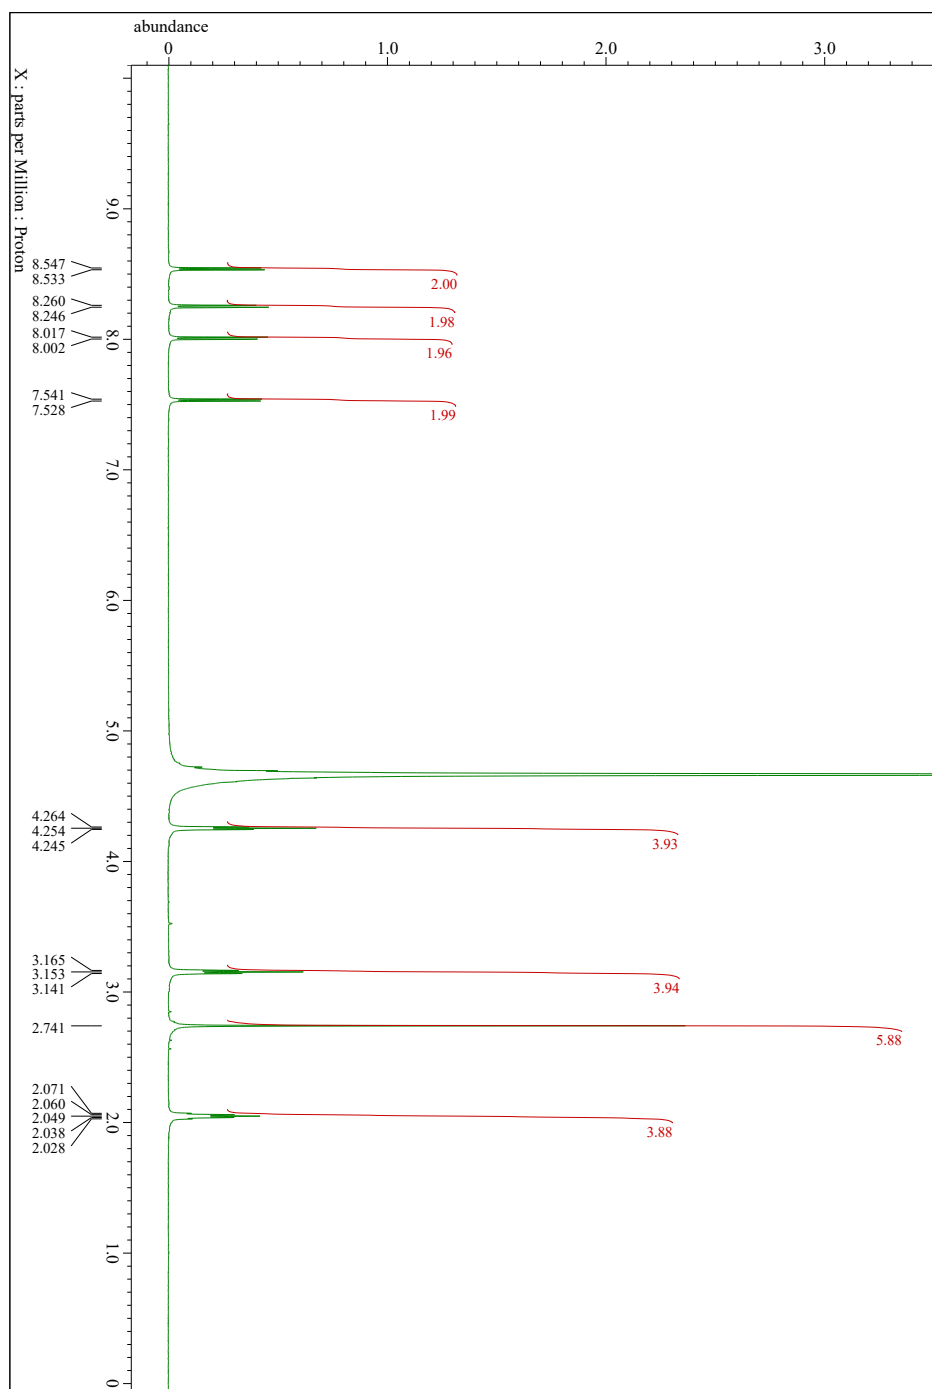

$^{13}\text{C}$ -NMR spectrum of  $^{15}\text{N}$ -NCD in  $\text{D}_2\text{O}$

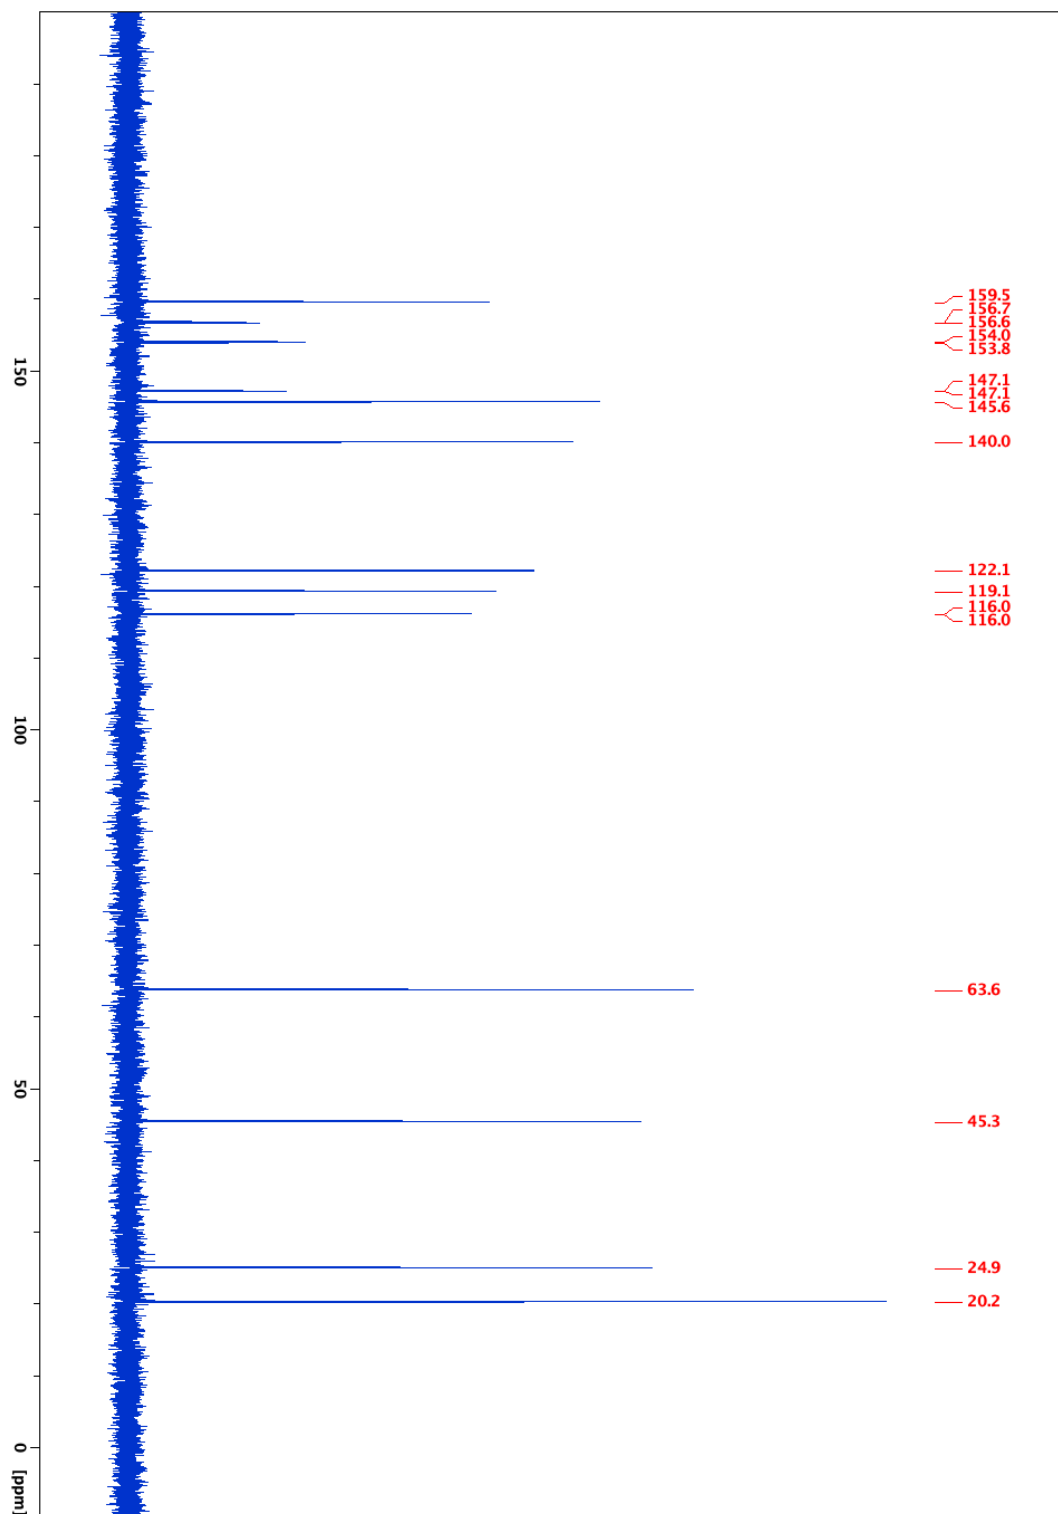

$^{15}\text{N}$ -NMR spectrum of  $^{15}\text{N}$ -NCD in  $\text{D}_2\text{O}$

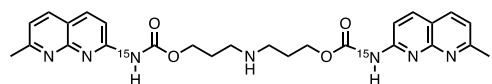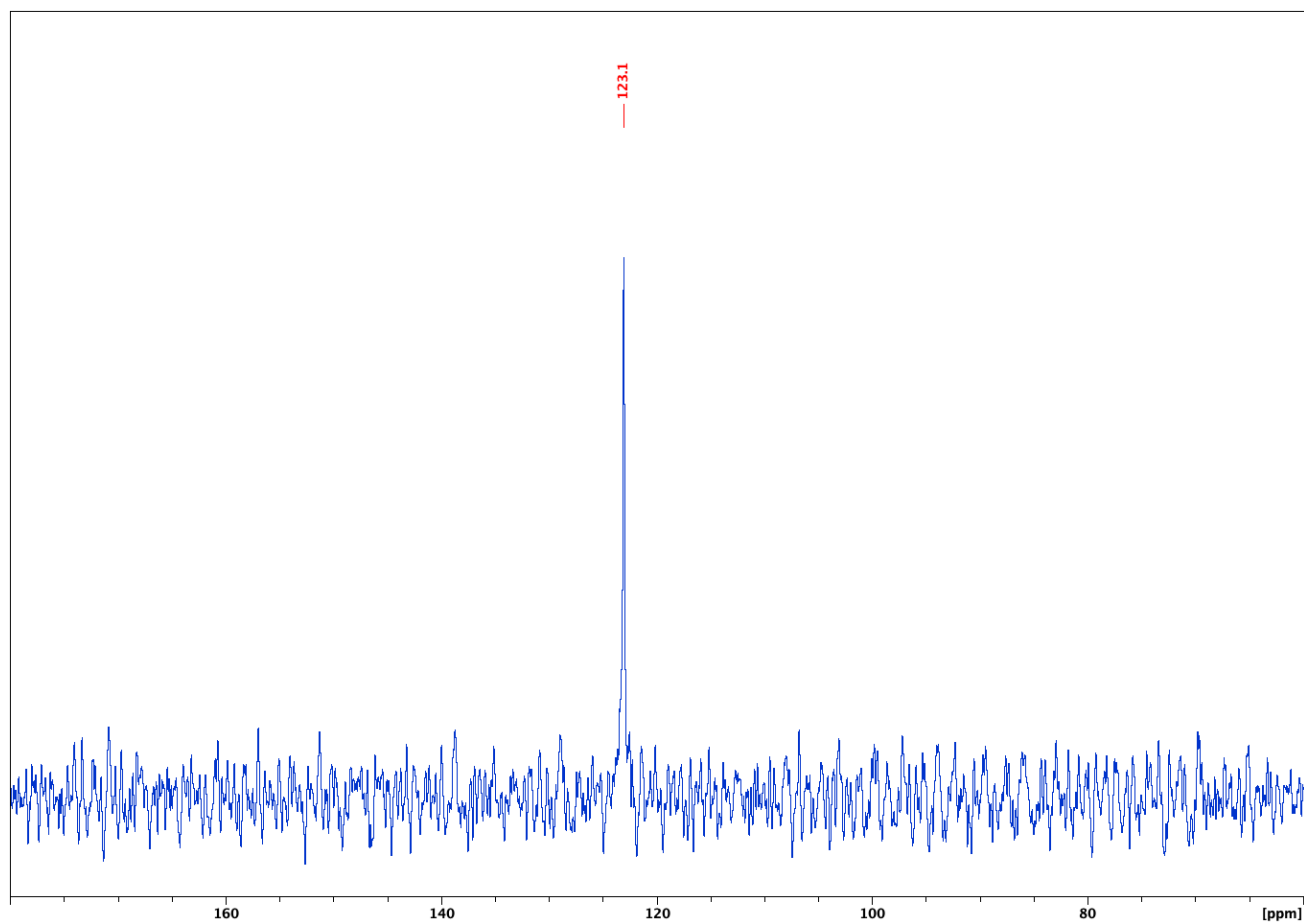

COSY spectrum of  $^{15}\text{N}$ -NCD in  $\text{D}_2\text{O}$  (The aromatic region)

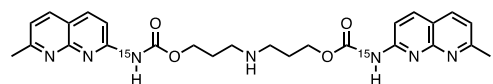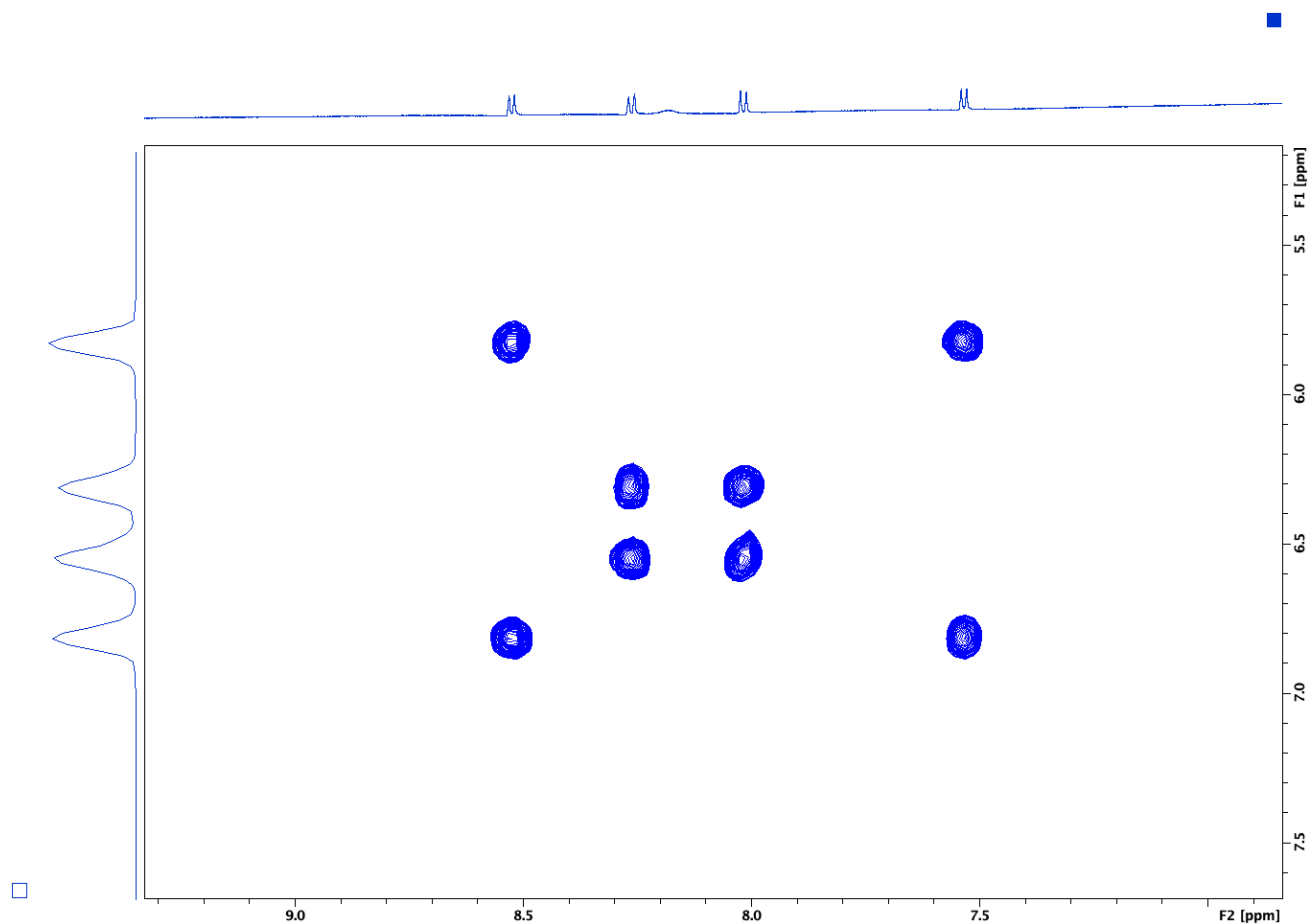

- 1 B. Brodbeck, B. Püllmann, S. E. Schmitt and M. Nettekoven, *Tetrahedron Lett.*, 2003, **44**, 1675–1678, ‘Parallel iterative solution-phase synthesis of 5-amino-1-aryl-[1,2,4]triazolo[1,5-a]pyridine-7-carboxylic acid amide derivatives’.
